# Supplementary material for: Evolution of Helicobacter: Acquisition by Gastric Species of Two Histidine-Rich Proteins Essential for Colonization
Source: PubMed Central journal article supplement (PMC4671568; doi:10.1371/journal.ppat.1005312), 2015-12-07

# Suppl Fig. 4

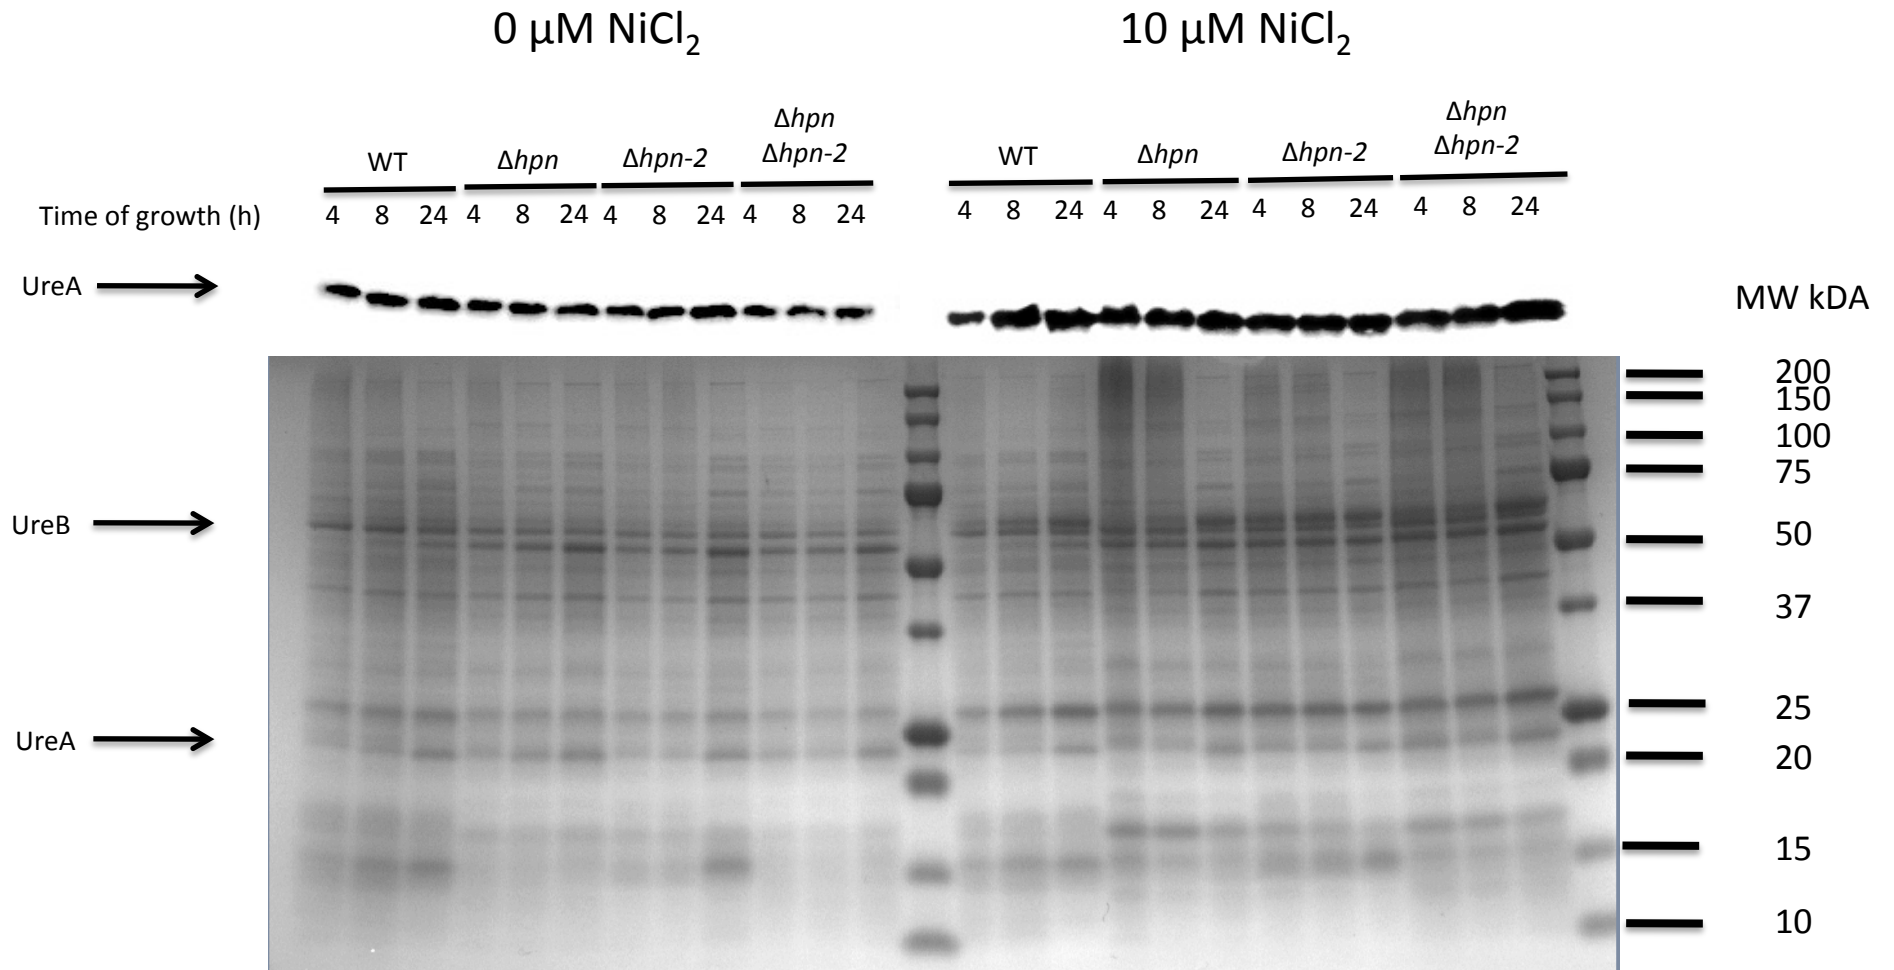

Supplement: ppat.1005312.s004.pdf [file ppat.1005312.s004.pdf]
