# Supplementary material for: Evolution of Helicobacter: Acquisition by Gastric Species of Two Histidine-Rich Proteins Essential for Colonization
Source: PLoS Pathog. 2015 Dec 7;11(12):e1005312. doi: 10.1371/journal.ppat.1005312 (PMC4671568; doi:10.1371/journal.ppat.1005312)
Supplement: S1 Table — The location of hpn and hpn-2 in genomic sequences are indicated, as well as the accession number of the corresponding proteins when they were annotated in public databases. The phylogeny of these 330 strains is shown in S1 Fig. Strains in bold have been used for further phylogenetic analysis. (XLSX) [file ppat.1005312.s005.xlsx]

## Sheet: Feuille1
	Hpn coding gene						Hpn2 coding gene
Strain (330 strains used in this study)	GI	Strand	Begin	End	Hpn annotated proteins	Strain (330 strains used in this study)	GI	Strand	Begin	End	Hpn2 annotated proteins
Hacinonychis Sheeba	109713861	reverse	102277	102101		Hacinonychis str. Sheeba	109713861	reverse	102750	102547
Hbilis ATCC 43879		Not found				Hbilis ATCC 43879		Not found
Hbilis ATCC 51630		Not found				Hbilis ATCC 51630		Not found
Hbilis WiWa		Not found				Hbilis WiWa		Not found
Hbizzozeronii CCUG 35545	375315794	reverse	2442	2275		Hbizzozeronii CCUG 35545		Not found
Hbizzozeronii CIII 1	335332259	reverse	519690	519523		Hbizzozeronii CIII 1		Not found
Hcanadensis MIT 98-5491 a		Not found				Hcanadensis MIT 98-5491 a		Not found
Hcanadensis MIT 98-5491 b		Not found				Hcanadensis MIT 98-5491 b		Not found
Hcanis NCTC 12740		Not found				Hcanis NCTC 12740		Not found
Hcetorum MIT 00 7128	384554969	forward	380494	380673		Hcetorum MIT 00 7128		Not found
Hcetorum MIT 99 5656	384553278	reverse	144145	143949		Hcetorum MIT 99 5656		Not found
Hcinaedi ATCC BAA 847		Not found				Hcinaedi ATCC BAA 847		Not found
Hcinaedi PAGU611		Not found				Hcinaedi PAGU611		Not found
Hfelis ATCC 49179	326319845	forward	393815	393985		Hfelis ATCC 49179		Not found
Hfennelliae MRY12-0050		Not found				Hfennelliae MRY12-0050		Not found
Hheilmannii ASB1 4	408906187	reverse	361066	360929		Hheilmannii ASB1 4		Not found
Hhepaticus ATCC 51449		Not found				Hhepaticus ATCC 51449		Not found
Hmacacae MIT 99-5501		Not found				Hmacacae MIT 99-5501		Not found
Hmustelae 12198	290963437	reverse	479261	479061		Hmustelae 12198		Not found
Hpametensis ATCC 51478		Not found				Hpametensis ATCC 51478		Not found
Hpullorum MIT 98-5489		Not found				Hpullorum MIT 98-5489		Not found
Hpylori 2017	325996870	reverse	1371574	1371395		Hpylori 2017	325996870	reverse	1372055	1371849
Hpylori 2018	325995266	reverse	1378201	1378022		Hpylori 2018	325995266	reverse	1378657	1378451
Hpylori 26695 a	409893163	reverse	1497190	1497011	P0A0V6	Hpylori 26695a	409893163	forward	1502605	1502821	AFV42651
Hpylori 26695 b	6626253	reverse	1497171	1496992		Hpylori 26695	6626253	forward	1502586	1502801
Hpylori 35A	315585794	reverse	13609	13430		Hpylori 35A	315585794	forward	19036	19242	ADU40197
Hpylori 51	261837457	reverse	1392033	1391854	ACX98466	Hpylori 51	261837457	forward	1397437	1397649	ACX98471
Hpylori 52	261838873	reverse	1375680	1375501	ACX99865	Hpylori 52	261838873	forward	1381084	1381296	ACX99870
Hpylori 83	332672788	reverse	1402539	1402360		Hpylori 83	332672788	forward	1407970	1408179	AEE71014
Hpylori 8A3	327397993	forward	13496	13675		Hpylori 8A3	327397993	reverse	8098	7907
Hpylori 908	307636682	reverse	1365173	1364994		Hpylori 908	307636682	reverse	1365654	1365448
Hpylori 98-10	216942963	forward	13991	14170		Hpylori 98-10	216942963	reverse	8587	8375
Hpylori A45	443620039	reverse	17322	17143	ELT80510	Hpylori A45	443620039	forward	22605	22979
Hpylori Aklavik117	425626953	reverse	1408779	1408600	AFX91747	Hpylori Aklavik117	425626953	forward	1414194	1414403
Hpylori Aklavik86	425628494	Not found				Hpylori Aklavik86	425628494	reverse	1375550	1375368
Hpylori B128	216946188	reverse	55814	55635		Hpylori B128	216946188	forward	61181	61378
Hpylori B38	254000649	reverse	1381615	1381436		Hpylori B38	254000649	forward	1387040	1387246
Hpylori B8	298354685	forward	111911	112090		Hpylori B8	298354685	reverse	106546	106349
Hpylori BCS100H1	327397940	reverse	8965	8786		Hpylori BCS100H1	327397940	forward	14363	14554
Hpylori BM012A	558757555	forward	246196	246375		Hpylori BM012A	558757555	reverse	240762	240568
Hpylori BM012S	558759127	forward	246384	246205		Hpylori BM012S	558759127	reverse	240771	240577
Hpylori CCHI 33	471382873	reverse	18736	18557		Hpylori CCHI 33	471382873	reverse	19220	19011
Hpylori CG-IMSS-2012	548650661	reverse	16517	16341		Hpylori CG-IMSS-2012	548650661	forward	21944	22174
Hpylori CPY1124	393011638	reverse	17002	16823		Hpylori CPY1124	393011638	forward	22406	22615
Hpylori CPY1313	393011157	reverse	17012	16833		Hpylori CPY1313	393011157	forward	22414	22620
Hpylori CPY1662	471431154	reverse	20072	19893		Hpylori CPY1662	471431154	forward	25474	25647
Hpylori CPY1962	393014512	reverse	16481	16302		Hpylori CPY1962	393014512	forward	21875	22060
Hpylori CPY3281	393015806	reverse	16005	15826		Hpylori CPY3281	393015806	forward	21411	21647
Hpylori CPY6081	393015969	reverse	16093	15914		Hpylori CPY6081	393015969	forward	21501	21689
Hpylori CPY6261	393020020	reverse	16848	16669		Hpylori CPY6261	393020020	forward	22257	22463
Hpylori CPY6271	393021543	reverse	17945	17766		Hpylori CPY6271	393021543	forward	23349	23549
Hpylori CPY6311	393020993	reverse	15985	15806		Hpylori CPY6311	393020993	forward	21401	21586	EJB22151
Hpylori Cuz20	308061305	reverse	1445655	1445479		Hpylori Cuz20	308061305	forward	1451068	1451265
Hpylori D33	657213133	forward	13479	13658		Hpylori D33	657213133	reverse	8074	7865
Hpylori E48	559754307	reverse	16632	16453		Hpylori E48	559754307	Not found
Hpylori ELS37	380873809	reverse	1472005	1471826		Hpylori ELS37	380873809	reverse	1472475	1472278
Hpylori F16	317176808	reverse	1386065	1385886		Hpylori F16	317176808	forward	1391470	1391691
Hpylori F30	317178309	reverse	1375918	1375739		Hpylori F30	317178309	forward	1381313	1381525
Hpylori F32	317179796	reverse	1387245	1387066		Hpylori F32	317179796	forward	1392643	1392858
Hpylori F57	317181290	reverse	1418076	1417897		Hpylori F57	317181290	forward	1423480	1423680
Hpylori FD423	532141600	forward	2	103		Hpylori FD423	532141632	reverse	10490	10359
Hpylori FD430	532143242	reverse	19961	19866		Hpylori FD430	532143223	forward	2	130
Hpylori FD506	532145144	forward	2	106		Hpylori FD506	532145173	reverse	9874	9746
Hpylori FD535	532146773	forward	3	104		Hpylori FD535	532146782	reverse	10287	10165
Hpylori FD568	532148660	forward	15321	15500		Hpylori FD568	532148660	reverse	9916	9725
Hpylori FD577	532150470	reverse	9007	8828		Hpylori FD577	532150468	forward	1	132
Hpylori FD662	532153729	forward	2	97		Hpylori FD662	532153755	reverse	8762	8631
Hpylori FD703	532151991	reverse	22302	22219		Hpylori FD703	532151982	forward	5486	5718	EQL66112
Hpylori FD719	532155544	forward	2	97		Hpylori FD719	532155580	reverse	10303	10190
Hpylori G27	208431905	reverse	1460687	1460508		Hpylori G27	208431905	forward	1466052	1466270	ACI28100
Hpylori GAM100Ai	410715549	forward	6068	6247		Hpylori GAM100Ai	410715549	forward	5559	5792	EKQ72969
Hpylori GAM101Biv	459488391	reverse	13105	12926		Hpylori GAM101Biv	459488391	reverse	13567	13379
Hpylori GAM103Biv	459487714	forward	6335	6514		Hpylori GAM103Bi	459487714	forward	5851	6060	EMG81340
Hpylori GAM105Ai	459490478	reverse	12949	12770		Hpylori GAM105Ai	459490478	reverse	13459	13226	EMG83994
Hpylori GAM112Ai	459492103	reverse	12420	12241		Hpylori GAM112Ai	459492103	reverse	12916	12695	EMG85543
Hpylori GAM114Ai	459493577	forward	13334	13513		Hpylori GAM114Ai	459493577	forward	12825	13058
Hpylori GAM115Ai	459492498	forward	5917	6096		Hpylori GAM115Ai	459492498	forward	5409	5642
Hpylori GAM117Ai	535930598	forward	6007	6186		Hpylori GAM117Ai	535930598	forward	5524	5733	ERA60558
Hpylori GAM118Bi	459498783	reverse	13374	13195		Hpylori GAM118Bi	459498783	reverse	13862	13650	EMG91880
Hpylori GAM119Bi	459499734	reverse	12961	12785		Hpylori GAM119Bi	459499734	reverse	13467	13237	EMG92788
Hpylori GAM120Ai	459501461	forward	7069	7248		Hpylori GAM120Ai	459501461	forward	6572	6793	EMG94431
Hpylori GAM121Aii	459503292	forward	11652	11828		Hpylori GAM121Aii	459503292	forward	11161	11376	EMG96163
Hpylori GAM201Ai	459498646	forward	5984	6163		Hpylori GAM201Ai	459498646	reverse	617	384
Hpylori GAM210Bi	459506981	reverse	12191	12012		Hpylori GAM210Bi	459506981	reverse	12697	12467	EMG99704
Hpylori GAM231Ai	459509910	reverse	12653	12474		Hpylori GAM231Ai	459509910	reverse	13139	12927
Hpylori GAM239Bi	459511863	forward	6265	6444		Hpylori GAM239Bi	459511863	forward	5785	5991	EMH04307
Hpylori GAM244Ai	459509490	reverse	12926	12747		Hpylori GAM244Ai	459509490	reverse	13415	13200	EMH02067
Hpylori GAM245Ai	459514310	forward	13651	13830		Hpylori GAM245Ai	459514310	forward	13160	13375	EMH06630
Hpylori GAM246Ai	459517322	reverse	12948	12769		Hpylori GAM246Ai	459517322	reverse	13460	13224
Hpylori GAM249T	459519946	forward	5843	6022		Hpylori GAM249T	459519946	forward	5337	5570	EMH11981
Hpylori GAM250AFi	459519267	reverse	12178	11999		Hpylori GAM250AFi	459519267	reverse	12687	12454	EMH11346
Hpylori GAM250T	459523467	reverse	12178	11999		Hpylori GAM250T	459523467	reverse	12687	12454	EMH15356
Hpylori GAM252Bi	459524298	forward	5848	6027		Hpylori GAM252Bi	459524298	forward	5339	5572	EMH16137
Hpylori GAM252T	459524518	reverse	12167	11988		Hpylori GAM252T	459524518	reverse	12676	12443	EMH16361
Hpylori GAM254Ai	459528224	reverse	12335	12156		Hpylori GAM254Ai	459528224	reverse	12335	12180
Hpylori GAM260ASi	459529955	reverse	12179	12000		Hpylori GAM260ASi	459529955	reverse	12683	12453	EMH21540
Hpylori GAM260Bi	459527891	reverse	12227	12048		Hpylori GAM260Bi	459527891	reverse	12731	12501	EMH19571
Hpylori GAM260BSi	459534428	forward	5832	6011		Hpylori GAM260BSi	459534428	forward	5352	5558
Hpylori GAM263BFi	459531698	reverse	12850	12671		Hpylori GAM263BFi	459531698	reverse	13358	13125
Hpylori GAM264Ai	459532970	reverse	471	292		Hpylori GAM264Ai	459532970	forward	5834	6064
Hpylori GAM265BSii	459537180	forward	13018	13197		Hpylori GAM265BSii	459537180	forward	12509	12742	EMH28410
Hpylori GAM268Bii	459536345	reverse	12649	12470		Hpylori GAM268Bii	459536345	reverse	13153	12923	EMH27616
Hpylori GAM270ASi	459540604	forward	1	141		Hpylori GAM270ASi	459540653	forward	5437	5670
Hpylori GAM42Ai	459542857	forward	5923	6102		Hpylori GAM42Ai	459542857	forward	5427	5648
Hpylori GAM71Ai	459544270	reverse	12411	12232		Hpylori GAM71Ai	459544270	reverse	12891	12685
Hpylori GAM80Ai	459542881	reverse	468	289		Hpylori GAM80Ai	459542881	reverse	974	744	EMH09472
Hpylori GAM83Bi	459546841	reverse	12423	12244		Hpylori GAM83Bi	459546841	reverse	12927	12697	EMH37555
Hpylori GAM83T	459548012	forward	5847	6026		Hpylori GAM83T	459548012	forward	5343	5573	EMH38643
Hpylori GAM93Bi	459554091	forward	6047	6226		Hpylori GAM93Bi	459554091	forward	5538	5771	EMH44387
Hpylori GAM96Ai	459550403	reverse	522	343		Hpylori GAM96Ai	459550403	reverse	1027	797	EMH40890
Hpylori Gambia94/24	317013424	reverse	1466927	1466748		Hpylori Gambia94/24	317013424	reverse	1467399	1467202
Hpylori GAMchJs114i	463121148	reverse	12390	12211		Hpylori GAMchJs114i	463121148	reverse	12855	12664
Hpylori GAMchJs117Ai	463120381	forward	6111	6290		Hpylori GAMchJs117Ai	463120381	forward	5622	5837	EMJ40832
Hpylori GAMchJs124i	463122626	forward	12561	12740		Hpylori GAMchJs124i	463122626	forward	12096	12290	EMJ42780
Hpylori GAMchJs136i	463125788	forward	13180	13359		Hpylori GAMchJs136i	463125788	forward	12670	12903
Hpylori GC26	532157264	forward	9631	9849		Hpylori GC26	532157264	reverse	4234	4049
Hpylori H13-1	559755041	forward	14352	14531		Hpylori H13-1	559755041	reverse	8952	8740
Hpylori HLJ039	575399773	forward	11948	12127		Hpylori HLJ039	575399773	reverse	6543	6322
Hpylori HLJHP193	400381460	forward	14277	14456		Hpylori HLJHP193	400381460	reverse	8872	8651
Hpylori HLJHP253	400381374	forward	15378	15557		Hpylori HLJHP253	400381374	reverse	9972	9754
Hpylori HLJHP256	400381403	forward	13840	14019		Hpylori HLJHP256	400381403	reverse	8436	8206
Hpylori HLJHP271	400381392	forward	13659	13838		Hpylori HLJHP271	400381392	reverse	8254	8045
Hpylori Hp A-11	477502313	reverse	38881	38702		Hpylori Hp A-11	477502313	forward	44276	44506
Hpylori Hp A-14	393071308	reverse	213884	213705		Hpylori Hp A-14	393071308	forward	219316	219549
Hpylori Hp A-16	393072533	reverse	157440	157261		Hpylori Hp A-16	393072533	reverse	157925	157716
Hpylori Hp A-17	393044034	reverse	21287	21108		Hpylori Hp A-17	393044034	reverse	21767	21561
Hpylori Hp A-20	393045038	reverse	22525	22445		Hpylori Hp A-20	393045038	reverse	23084	22851
Hpylori Hp A-26	393071860	forward	17593	17775		Hpylori Hp A-26	393071860	reverse	12156	11923
Hpylori Hp A-27	393074455	reverse	19001	18822		Hpylori Hp A-27	393074455	forward	24420	24644
Hpylori Hp A-4	393039280	reverse	21836	21657		Hpylori Hp A-4	393039280	reverse	22342	22109
Hpylori Hp A-5	393039743	reverse	12582	12403		Hpylori Hp A-5	393039743	reverse	13090	12857
Hpylori Hp A-6	393066921	reverse	18596	18417		Hpylori Hp A-6	393066921	reverse	18869	18943
Hpylori Hp A-8	393067645	reverse	23255	23076		Hpylori Hp A-8	393067645	reverse	23764	23531
Hpylori Hp A-9	393040259	reverse	40373	40194		Hpylori Hp A-9	393040259	forward	45790	46020
Hpylori Hp H-1	471384880	reverse	18475	18296		Hpylori Hp H-1	471384880	reverse	18981	18748
Hpylori Hp H-10	393083611	reverse	22771	22592		Hpylori Hp H-10	393083611	reverse	23255	23046
Hpylori Hp H-11	393086715	reverse	21078	20899		Hpylori Hp H-11	393086715	forward	26502	26735
Hpylori Hp H-16	393046617	forward	402316	402495		Hpylori Hp H-16	393046617	forward	401843	402040
Hpylori Hp H-18	393086693	reverse	12287	12108		Hpylori Hp H-18	393086693	reverse	12819	12562
Hpylori Hp H-19	393090315	reverse	22656	22477		Hpylori Hp H-19	393090315	reverse	22932	23006
Hpylori Hp H-21	393089925	forward	359375	359554		Hpylori Hp H-21	393089925	forward	358868	359101
Hpylori Hp H-23	393092222	reverse	585954	585775		Hpylori Hp H-23	393092222	reverse	586441	586229
Hpylori Hp H-24	393047873	reverse	23149	22973		Hpylori Hp H-24	393047873	reverse	23657	23424
Hpylori Hp H-24b	393116347	reverse	23185	23009		Hpylori Hp H-24b	393116347	reverse	23693	23460
Hpylori Hp H-24c	393117352	reverse	23106	22930		Hpylori Hp H-24c	393117352	reverse	23614	23381
Hpylori Hp H-27	393052442	reverse	16159	15980		Hpylori Hp H-27	393052442	forward	21600	21830
Hpylori Hp H-28	393051219	reverse	100314	100135		Hpylori Hp H-28	393051219	forward	105750	105941
Hpylori Hp H-29	393053929	reverse	23199	23020		Hpylori Hp H-29	393053929	reverse	23708	23475
Hpylori Hp H-3	393077845	forward	410648	410827		Hpylori Hp H-3	393077845	forward	410167	410373
Hpylori Hp H-30	393054214	reverse	22596	22417		Hpylori Hp H-30	393054214	reverse	23075	22872
Hpylori Hp H-34	393096911	reverse	79347	79168		Hpylori Hp H-34	393096911	reverse	79817	79626
Hpylori Hp H-36	393060291	forward	15325	15504		Hpylori Hp H-36	393060291	forward	14840	15049
Hpylori Hp H-4	393077812	reverse	20032	19853		Hpylori Hp H-4	393077812	reverse	20542	20309
Hpylori Hp H-41	393058399	reverse	22396	22217		Hpylori Hp H-41	393058399	reverse	22899	22669
Hpylori Hp H-42	393059666	forward	7389	7568		Hpylori Hp H-42	393059666	forward	6902	7114
Hpylori Hp H-43	393062183	reverse	16951	16772		Hpylori Hp H-43	393062183	forward	22380	22571
Hpylori Hp H-44	393062481	reverse	21551	21372		Hpylori Hp H-44	393062481	reverse	21826	21900
Hpylori Hp H-45	393064879	reverse	19905	19726		Hpylori Hp H-45	393064879	forward	25328	25546
Hpylori Hp H-5b	393125211	reverse	18581	18402		Hpylori Hp H-5b	393125211	Not found
Hpylori Hp H-6	393078985	reverse	22674	22495		Hpylori Hp H-6	393078985	reverse	23181	22951
Hpylori Hp H-9	393082972	reverse	18393	18214		Hpylori Hp H-9	393082972	forward	23764	23991
Hpylori Hp M1	393135843	reverse	19451	19275		Hpylori Hp M1	393135843	reverse	19959	19726
Hpylori Hp M2	393140604	reverse	18794	18618		Hpylori Hp M2	393140604	reverse	19302	19069
Hpylori Hp M3	393140698	reverse	23197	23021		Hpylori Hp M3	393140698	reverse	23705	23472
Hpylori Hp M4	393142726	reverse	22706	22530		Hpylori Hp M4	393142726	reverse	23214	22981
Hpylori Hp M5	393144312	reverse	19283	19107		Hpylori Hp M5	393144312	reverse	19791	19558
Hpylori Hp M6	393145710	reverse	13771	13595		Hpylori Hp M6	393145710	reverse	14279	14046
Hpylori Hp M9	393159230	reverse	326254	326078		Hpylori Hp M9	393159230	reverse	326762	326529
Hpylori Hp P-1	393097717	forward	94790	94969		Hpylori Hp P-1	393097717	forward	94285	94518
Hpylori Hp P-11	393104708	reverse	22264	22085		Hpylori Hp P-11	393104708	reverse	22770	22540
Hpylori Hp P-11b	393125794	reverse	22390	22211		Hpylori Hp P-11b	393125794	reverse	22896	22666
Hpylori Hp P-13	393104921	reverse	22610	22431		Hpylori Hp P-13	393104921	reverse	23116	22886
Hpylori Hp P-13b	393129874	forward	360908	361087		Hpylori Hp P-13b	393129874	forward	360402	360632
Hpylori Hp P-15	393108403	reverse	20639	20460		Hpylori Hp P-15	393108403	forward	26062	26292
Hpylori Hp P-15b	393133493	reverse	20851	20672		Hpylori Hp P-15b	393133493	forward	26274	26504
Hpylori Hp P-16	393110093	reverse	252720	252541		Hpylori Hp P-16	393110093	forward	258129	258323
Hpylori Hp P-1b	393121965	reverse	20519	20340		Hpylori Hp P-1b	393121965	reverse	21024	20791
Hpylori Hp P-2	393096843	reverse	45322	45143		Hpylori Hp P-2	393096843	reverse	45810	45598
Hpylori Hp P-23	393110378	reverse	18373	18194		Hpylori Hp P-23	393110378	forward	23800	24042
Hpylori Hp P-25	393114335	reverse	18811	18632		Hpylori Hp P-25	393114335	reverse	19284	19087
Hpylori Hp P-25d	393137947	reverse	18879	18700		Hpylori Hp P-25d	393137947	reverse	19352	19155
Hpylori Hp P-26	393148680	reverse	21004	20825		Hpylori Hp P-26	393148680	reverse	21509	21279
Hpylori Hp P-28b	393135355	reverse	22923	22747		Hpylori Hp P-28b	393135355	reverse	23419	23198
Hpylori Hp P-2b	393155657	forward	339722	339901		Hpylori Hp P-2b	393155657	forward	339234	339446
Hpylori Hp P-3	393098685	reverse	19580	19362		Hpylori Hp P-3	393098685	reverse	20061	19855
Hpylori Hp P-30	393151965	reverse	19265	19086		Hpylori Hp P-30	393151965	forward	24696	24905
Hpylori Hp P-3b	393155497	reverse	23065	22901		Hpylori Hp P-3b	393155497	reverse	23546	23340
Hpylori Hp P-4	393099839	reverse	22814	22650		Hpylori Hp P-4	393099839	reverse	23301	23089
Hpylori Hp P-41	393148958	reverse	22626	22447		Hpylori Hp P-41	393148958	reverse	23110	22901
Hpylori Hp P-4c	393123593	reverse	18772	18554		Hpylori Hp P-4c	393123593	reverse	19259	19047
Hpylori Hp P-4d	393124812	reverse	20908	20688		Hpylori Hp P-4d	393124812	reverse	21395	21183
Hpylori Hp P-62	393153863	forward	366807	366986		Hpylori Hp P-62	393153863	forward	366298	366531
Hpylori Hp P-74	393116740	reverse	18238	18059		Hpylori Hp P-74	393116740	forward	23661	23891
Hpylori Hp P-8	393100538	reverse	20323	20144		Hpylori Hp P-8	393100538	reverse	20806	20597
Hpylori Hp P-8b	393125566	reverse	20905	20726		Hpylori Hp P-8b	393125566	reverse	21388	21179
Hpylori HP116Bi	459556435	reverse	12278	12099		Hpylori HP116Bi	459556435	reverse	12786	12553
Hpylori HP250AFii	459560103	reverse	12176	11997		Hpylori HP250AFii	459560103	reverse	12685	12452	EMH50128
Hpylori HP250AFiii	459559506	forward	5848	6027		Hpylori HP250AFiii	459559506	forward	5339	5572	EMH49555
Hpylori HP250AFiV	459561898	forward	6278	6457		Hpylori HP250AFiV	459561898	forward	5769	6002	EMH51827
Hpylori HP250ASi	459563988	reverse	12228	12049		Hpylori HP250ASi	459563988	reverse	12737	12504	EMH53842
Hpylori HP250ASii	459564729	reverse	12230	12051		Hpylori HP250ASii	459564729	reverse	12739	12506	EMH54545
Hpylori HP250BFi	459568114	reverse	12161	11982		Hpylori HP250BFi	459568114	reverse	12670	12437	EMH57771
Hpylori HP250BFii	459567116	forward	6280	6459		Hpylori HP250BFii	459567116	forward	5771	6004	EMH56818
Hpylori HP250BFiii	459569577	forward	5848	6027		Hpylori HP250BFiii	459569577	forward	5339	5572	EMH59139
Hpylori HP250BFiV	459573211	reverse	12174	11995		Hpylori HP250BFiV	459573211	reverse	12683	12450	EMH62598
Hpylori HP250BSi	459574742	forward	5848	6027		Hpylori HP250BSi	459574742	forward	5339	5572	EMH64036
Hpylori HP260AFi	459574095	reverse	12651	12472		Hpylori HP260AFi	459574095	reverse	13155	12925	EMH63438
Hpylori HP260AFii	459579099	reverse	12652	12473		Hpylori HP260AFii	459579099	reverse	13156	12926	EMH68174
Hpylori HP260ASii	459579609	forward	12782	12961		Hpylori HP260ASii	459579609	forward	12278	12508	EMH68666
Hpylori HP260BFii	459579718	forward	12799	12978		Hpylori HP260BFii	459579718	forward	12319	12525
Hpylori HP260Bi	459581625	forward	5907	6086		Hpylori HP260Bi	459581625	forward	5403	5633	EMH70577
Hpylori HPAG1	107836197	reverse	1403889	1403710	ABF85419	Hpylori HPAG1	107836197	forward	1409310	1409519	ABF85424
Hpylori HPARG63	523555532	forward	12529	12708		Hpylori HPARG63	523555532	forward	12049	12255
Hpylori HUP B14	384551775	reverse	1406449	1406270	AFI08038	Hpylori HUP B14	384551775	forward	1411808	1411906
Hpylori India7	317008680	forward	1607269	1607448		Hpylori India7	317008680	reverse	1601845	1601633
Hpylori J166output 1moA	633284430	forward	13207	13386		Hpylori J166output 1moA	633284430	reverse	7833	7636
Hpylori J166output 1moC	633284566	reverse	37742	37563		Hpylori J166output 1moC	633284566	forward	43116	43313
Hpylori J166output 1wkA	633284859	reverse	37706	37527		Hpylori J166output 1wkA	633284859	forward	43080	43277
Hpylori J166output 1wkC	633284444	forward	13207	13386		Hpylori J166output 1wkC	633284444	reverse	7833	7636
Hpylori J166output 2moA	633284565	forward	12808	12987		Hpylori J166output 2moA	633284565	reverse	7434	7237
Hpylori J166output 2moC	633284714	forward	12808	12987		Hpylori J166output 2moC	633284714	reverse	7434	7237
Hpylori J166output 6moA	633284731	reverse	98762	98583		Hpylori J166output 6moA	633284731	forward	104136	104333
Hpylori J166output 6moC	633284846	reverse	36650	36471		Hpylori J166output 6moC	633284846	forward	42024	42221
Hpylori J99	12057207	reverse	1449377	1449556	P0A0V7	Hpylori J99	12057207	reverse	1450061	1449831	AAD06903
Hpylori Lithuania75	317011857	reverse	1399600	1399421		Hpylori Lithuania75	317011857	forward	1404998	1405240
Hpylori N6	384527583	forward	5843	6022		Hpylori N6	384527583	reverse	474	241
Hpylori NAB47	400365260	forward	13806	13973		Hpylori NAB47	400365260	reverse	8382	8170
Hpylori NAD1	400365033	forward	6472	6651		Hpylori NAD1	400365033	reverse	1032	799
Hpylori NAK7	507146636	reverse	16669	16490		Hpylori NAK7	507146636	forward	22086	22289
Hpylori NCTC 11637	384374564	forward	13913	14092		Hpylori NCTC 11637	384374564	reverse	8473	8240
Hpylori NQ1671	327407074	forward	14258	14437		Hpylori NQ1671	327407074	forward	13774	13983
Hpylori NQ1701	327406222	forward	12805	12984		Hpylori NQ1701	327406222	forward	12305	12529
Hpylori NQ1707	327406624	reverse	18610	18431		Hpylori NQ1707	327406624	reverse	19098	18886
Hpylori NQ1712	327398118	forward	10821	10997		Hpylori NQ1712	327398118	reverse	5417	5184
Hpylori NQ315	327398059	reverse	17039	16863		Hpylori NQ315	327398059	forward	22443	22676
Hpylori NQ352	327406103	forward	5350	5529		Hpylori NQ352	327406103	forward	4847	5074
Hpylori NQ367	327406841	reverse	18229	18050		Hpylori NQ367	327406841	reverse	18714	18505
Hpylori NQ392	327406343	reverse	18609	18430		Hpylori NQ392	327406343	reverse	19097	18885
Hpylori NQ4044	393030900	reverse	17221	17042		Hpylori NQ4044	393030900	forward	22586	22819
Hpylori NQ4053	393031422	forward	518041	518220		Hpylori NQ4053	393031422	reverse	512601	512344
Hpylori NQ4060	327406737	forward	13364	13543		Hpylori NQ4060	327406737	forward	12876	13088
Hpylori NQ4076	393031057	reverse	224619	224440		Hpylori NQ4076	393031057	forward	230038	230253
Hpylori NQ4099	393029120	forward	13878	14060		Hpylori NQ4099	393029120	reverse	8458	8177
Hpylori NQ4110	393036298	reverse	19632	19453		Hpylori NQ4110	393036298	forward	25052	25285
Hpylori NQ4161	393035136	reverse	17896	17717		Hpylori NQ4161	393035136	reverse	18380	18171
Hpylori NQ4191	327407129	reverse	18229	18050		Hpylori NQ4191	327407129	reverse	18713	18504
Hpylori NQ4200	393025980	forward	28108	28287		Hpylori NQ4200	393025980	reverse	22693	22484
Hpylori NQ4216	393021250	reverse	17301	17122		Hpylori NQ4216	393021250	reverse	17810	17577
Hpylori NQ4228	393029926	reverse	20343	20164		Hpylori NQ4228	393029926	reverse	20803	20618
Hpylori OK113	459942343	reverse	1419380	1419201		Hpylori OK113	459942343	forward	1424785	1424976
Hpylori OK310	459943864	reverse	1363208	1363029		Hpylori OK310	459943864	forward	1368611	1368796
Hpylori P12	210132169	reverse	1480385	1480206		Hpylori P12	210132169	forward	1485796	1486029	ACJ08552
Hpylori P79	384373333	reverse	13182	13060		Hpylori P79	384373196	forward	5446	5661
Hpylori PeCan18	384561342	forward	1558464	1558643	AFI03216	Hpylori PeCan18	384561342	forward	1557955	1558188
Hpylori PeCan4	308064373	reverse	1389427	1389248		Hpylori PeCan4	308064373	forward	1394856	1395074
Hpylori Puno120	344334211	reverse	1403393	1403211		Hpylori Puno120	344334211	forward	1408809	1408997
Hpylori Puno135	344335753	reverse	1458020	1457841		Hpylori Puno135	344335753	forward	1463427	1463618	AEN19107
Hpylori PZ5004	531088163	forward	3	101		Hpylori PZ5004	531088269	forward	735	944
Hpylori PZ5024	531088813	reverse	4824	4645		Hpylori PZ5024	531088813	Not found
Hpylori PZ5026	531083631	reverse	4823	4731		Hpylori PZ5026	531079297	reverse	586	356
Hpylori PZ5056	531089637	forward	456	635		Hpylori PZ5056	531089637	forward	1	180
Hpylori PZ5080	531080413	forward	3	83		Hpylori PZ5080	531084957	reverse	542	327
Hpylori PZ5086	531083558	Not found				Hpylori PZ5086	531083558	forward	5606	5791
Hpylori R018c	407208692	reverse	72209	72030		Hpylori R018c	407208692	forward	77637	77882
Hpylori R030b	407209972	reverse	22301	22122		Hpylori R030b	407209972	reverse	22824	22576
Hpylori R036d	407214721	reverse	20959	20780		Hpylori R036d	407214721	forward	26380	26589
Hpylori R037c	407221734	reverse	21081	20902		Hpylori R037c	407221734	forward	26504	26713
Hpylori R038b	407218601	reverse	13587	13390		Hpylori R038b	407218601	forward	19017	19211
Hpylori R046Wa	407219021	reverse	25131	24952		Hpylori R046Wa	407219021	forward	30556	30750
Hpylori R055a	407222933	reverse	21116	20937		Hpylori R055a	407222933	forward	26522	26734
Hpylori R056a	407226174	reverse	72209	72030		Hpylori R056a	407226174	forward	77637	77882
Hpylori R32b	407213339	reverse	98822	98643		Hpylori R32b	407213339	forward	104186	104374
Hpylori Rif1	409894893	reverse	1497185	1497006	AFV44240	Hpylori Rif1	409894893	forward	1502600	1502815	AFV44246
Hpylori Rif2	409896556	reverse	1497191	1497012	AFV45833	Hpylori Rif2	409896556	forward	1502606	1502821	AFV45839
Hpylori Sahul64	571137558	reverse	9298	9119		Hpylori Sahul64	571137558	forward	14728	14922
Hpylori Sat464	308062870	reverse	1369594	1369418		Hpylori Sat464	308062870	forward	1375009	1375275
Hpylori Shi112	384559777	reverse	1471195	1471019		Hpylori Shi112	384559777	forward	1476592	1476816
Hpylori Shi169	384558251	reverse	1427524	1427348		Hpylori Shi169	384558251	forward	1432923	1433147
Hpylori Shi417	384556702	reverse	1429666	1429490		Hpylori Shi417	384556702	forward	1435079	1435303
Hpylori Shi470	189491895	reverse	1417762	1417586		Hpylori Shi470	189491895	forward	1423179	1423385
Hpylori SJM180	308059716	reverse	1460269	1460090		Hpylori SJM180	308059716	forward	1465640	1465873
Hpylori SNT49	344331165	reverse	1424659	1424480		Hpylori SNT49	344331165	forward	1430084	1430296
Hpylori SouthAfrica20	531848078	reverse	1367633	1367454		Hpylori SouthAfrica20	532105813	forward	1373008	1373229
Hpylori SouthAfrica50	531074092	forward	247631	247810		Hpylori SouthAfrica50	531074092	reverse	242257	242060
Hpylori SouthAfrica7	317010283	reverse	1361342	1361163		Hpylori SouthAfrica7	317010283	forward	1366717	1366926
Hpylori UM007	507146961	forward	13514	13693		Hpylori UM007	507146961	reverse	8110	7904
Hpylori UM018	507146652	forward	7201	7380		Hpylori UM018	507146652	reverse	1766	1536
Hpylori UM023	529179435	forward	16970	17149		Hpylori UM023	529179435	reverse	11593	11384
Hpylori UM032	684654607	forward	774483	774665		Hpylori UM032	684654607	reverse	769075	768869
Hpylori UM034	507146898	forward	13380	13559		Hpylori UM034	507146898	reverse	7961	7770
Hpylori UM037	531846267	forward	5495	5674		Hpylori UM037	531846300	reverse	1177	1040
Hpylori UM038	529179302	forward	7114	7293		Hpylori UM038	529179302	reverse	1709	1500
Hpylori UM045	507146963	reverse	16698	16519		Hpylori UM045	507146963	forward	22078	22308
Hpylori UM054	507146682	reverse	20161	19982		Hpylori UM054	507146682	forward	25577	25807
Hpylori UM065	529179828	forward	15651	15830		Hpylori UM065	529179828	reverse	10247	10062
Hpylori UM066	531848078	forward	15864	16043		Hpylori UM066	531848078	reverse	10466	10272
Hpylori UM067	529251351	reverse	20759	20580		Hpylori UM067	529251351	forward	26176	26409
Hpylori UM077	529252102	forward	15363	15542		Hpylori UM077	529252102	reverse	9968	9783
Hpylori UM084	529184339	forward	15259	15438		Hpylori UM084	529184339	reverse	9833	9600
Hpylori UM085	529253667	forward	16059	16238		Hpylori UM085	529253667	reverse	10651	10424
Hpylori UM111	529185287	forward	15662	15841		Hpylori UM111	529185287	reverse	10255	10046
Hpylori UM114	529216043	reverse	13403	13224		Hpylori UM114	529216043	forward	18814	19020
Hpylori UM298	685885934	forward	774485	774667		Hpylori UM298	685885934	reverse	769077	768871
Hpylori UM299	684655069	forward	774484	774666		Hpylori UM299	684655069	reverse	769076	768870
Hpylori UMB G1	471384131	reverse	20968	20789		Hpylori UMB G1	471384131	forward	26369	26614
Hpylori v225d	297379223	reverse	1403765	1403586		Hpylori v225d	297379223	forward	1409181	1409390
Hpylori wls-5-1	594682035	reverse	16118	15939		Hpylori wls-5-1	594682035	forward	21522	21731
Hpylori wls-5-10	594650365	reverse	16116	15937		Hpylori wls-5-10	594650365	forward	21520	21729
Hpylori wls-5-11	594650150	reverse	12681	12502		Hpylori wls-5-11	594650150	forward	18084	18290
Hpylori wls-5-12	529154379	reverse	12688	12509		Hpylori wls-5-12	529154379	forward	18091	18297
Hpylori wls-5-13	594649859	forward	27218	27397		Hpylori wls-5-13	594649859	reverse	21815	21609
Hpylori wls-5-14	594649680	reverse	12687	12508		Hpylori wls-5-14	594649680	forward	18090	18296
Hpylori wls-5-15	594650250	reverse	13703	13524		Hpylori wls-5-15	594650250	forward	19107	19316
Hpylori wls-5-16	594649354	reverse	16119	15940		Hpylori wls-5-16	594649354	forward	21523	21732
Hpylori wls-5-17	594649282	reverse	12677	12498		Hpylori wls-5-17	594649282	forward	18080	18286
Hpylori wls-5-18	594649345	reverse	16110	15931		Hpylori wls-5-18	594649345	forward	21514	21723
Hpylori wls-5-2	594682002	reverse	16289	16110		Hpylori wls-5-2	594682002	forward	21693	21902
Hpylori wls-5-3	529154384	reverse	16147	15968		Hpylori wls-5-3	529154384	forward	21551	21760
Hpylori wls-5-4	594652139	reverse	16119	15940		Hpylori wls-5-4	594652139	forward	21523	21732
Hpylori wls-5-5	594651358	reverse	10396	10217		Hpylori wls-5-5	594651358	forward	15799	16005
Hpylori wls-5-6	594651157	reverse	18798	18619		Hpylori wls-5-6	594651157	forward	24201	24410
Hpylori wls-5-7	594651103	reverse	13533	13354		Hpylori wls-5-7	594651103	forward	18937	19146
Hpylori wls-5-8	594650684	reverse	16079	15900		Hpylori wls-5-8	594650684	forward	21483	21692
Hpylori wls-5-9	594650646	reverse	16112	15933		Hpylori wls-5-9	594650646	forward	21516	21725
Hpylori X47-2AL	558552313	forward	6001	6180		Hpylori X47-2AL	558552313	reverse	571	356
Hpylori XZ274	387572303	reverse	1446938	1446759		Hpylori XZ274	387572303	forward	1452343	1452558
Hrodentium ATCC 700285		Not found				Hrodentium ATCC 700285		Not found
Hsuis HS1	321148481	forward	37932	38090		Hsuis HS1		Not found
Hsuis HS5	321146766	forward	28501	28659		Hsuis HS5		Not found
Hwinghamensis ATCC BAA-430		Not found				Hwinghamensis ATCC BAA-430		Not found
